# Supplementary material
Source: PubMed Central journal article supplement (PMC2924476)

## Supplementary Appendix

This appendix has been provided by the authors to give readers additional information about their work.

Supplement to: Glauser TA, Cnaan A, Shinnar S, et al. Ethosuximide, valproic acid, and lamotrigine in childhood absence epilepsy. *N Engl J Med* 2010;362:790-9.

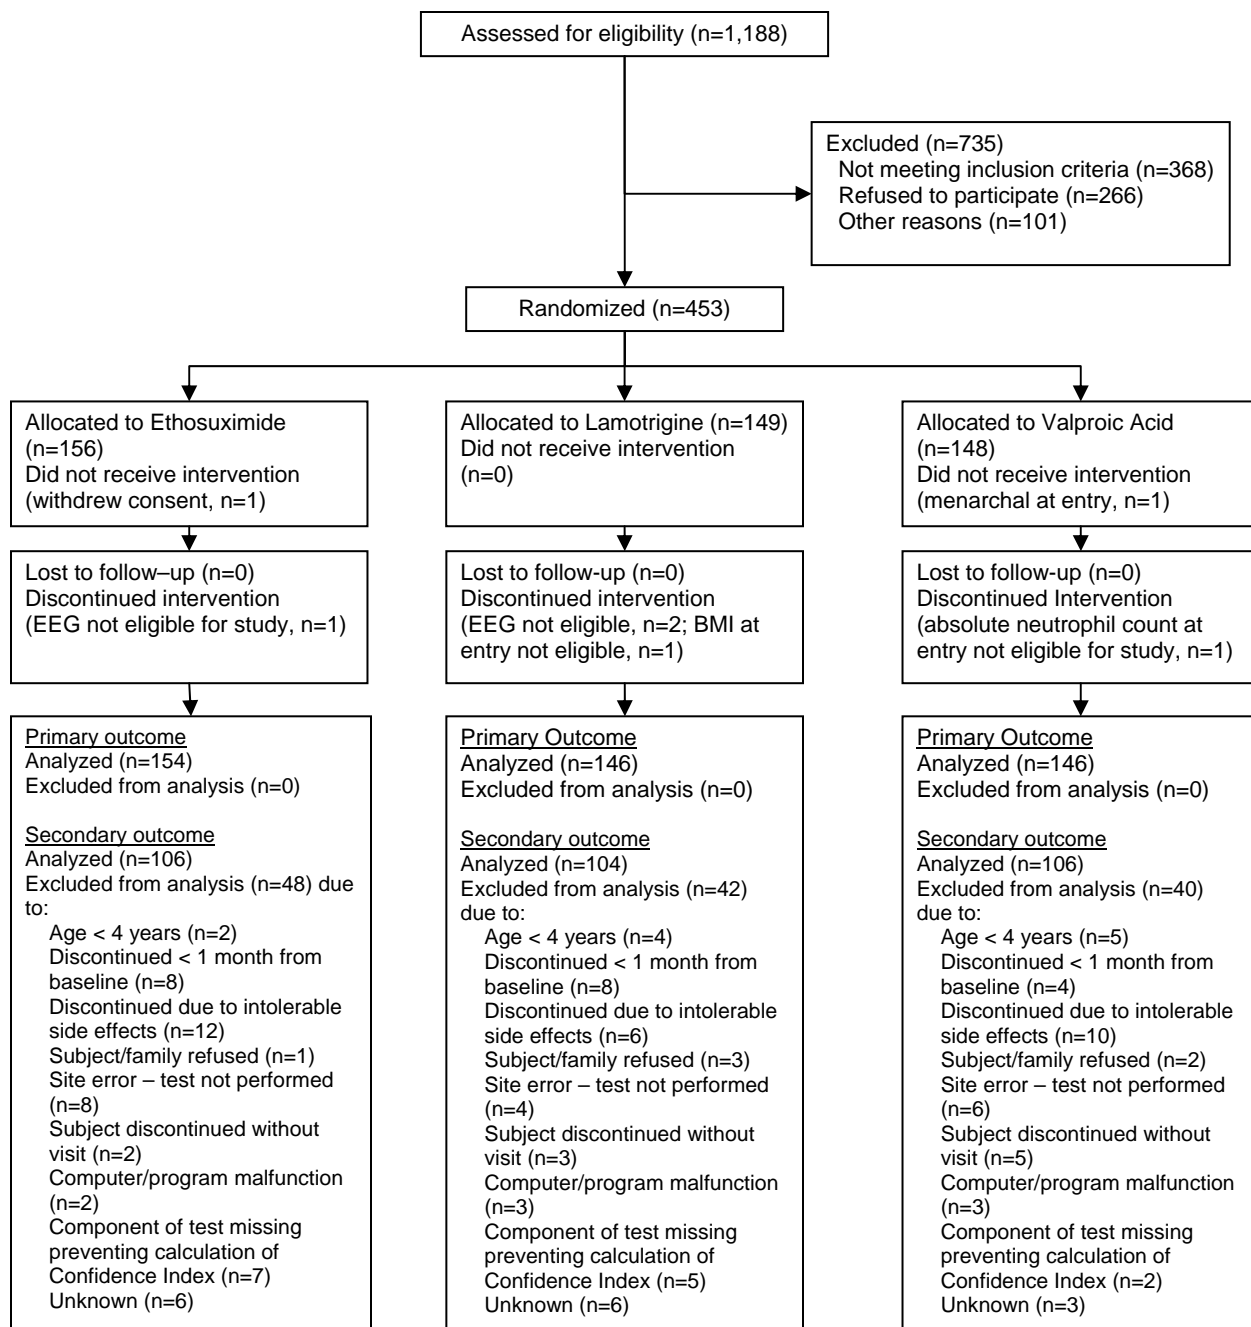

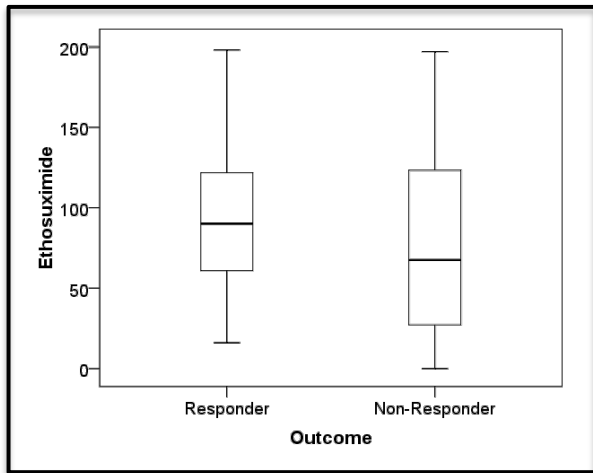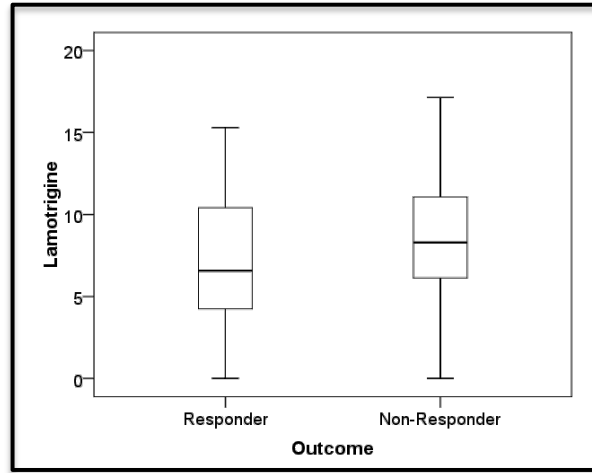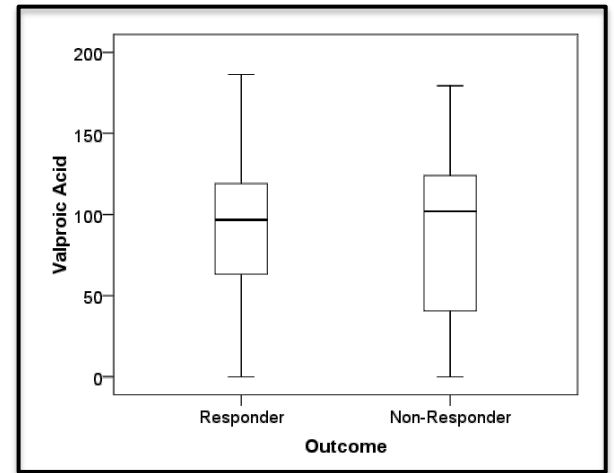

Supplement: NIHMS194033-supplement-Supplement.pdf [file NIHMS194033-supplement-Supplement.pdf]
